# Supplementary material for: Synthesis, Characterization and Host-Guest Complexation of Asplatin: Improved In Vitro Cytotoxicity and Biocompatibility as Compared to Cisplatin
Source: Pharmaceuticals (Basel). 2022 Feb 21;15(2):259. doi: 10.3390/ph15020259 (PMC8875750; doi:10.3390/ph15020259)
Supplement: Supplementary file 1 [file pharmaceuticals-15-00259-s001.zip › pharmaceuticals-1560409-supplementary.pdf]

# Supplementary Materials

## Synthesis, Characterization and Host-Guest Complexation of Asplatin: Improved *In-vitro* Cytotoxicity and Biocompatibility As Compared to Cisplatin

Sherif Ashraf Fahmy<sup>1,2</sup>, Fortuna Ponte<sup>3</sup>, Giulia Grande<sup>3</sup>, Iten M. Fawzy<sup>4</sup>, Asmaa A. Mandour<sup>4</sup>, Emilia Sicilia<sup>3</sup>, Hassan Mohamed El-Said Azzazy<sup>1,\*</sup>

<sup>1</sup> Department of Chemistry, School of Sciences & Engineering, The American University in Cairo, AUC Avenue, PO. Box 74, New Cairo 11835, Egypt; sheriffahmy@aucegypt.edu

<sup>2</sup> School of Life and Medical Sciences, University of Hertfordshire Hosted by Global Academic Foundation, R5 New Garden City, New Capital, Cairo 11835, Egypt

<sup>3</sup> Department of Chemistry and Chemical Technologies, University of Calabria, Arcavacata di Rende, 87036, Italy; [fortuna.ponte@unical.it](mailto:fortuna.ponte@unical.it); giulia-grande@hotmail.com; emilia.sicilia@unical.it

<sup>4</sup> Pharmaceutical Chemistry Department, Faculty of Pharmacy, Future University in Egypt, Cairo 11835, Egypt; iten.mamdouh@fue.edu.eg; asmaa.abdelkereim@fue.edu.eg

\* Correspondence: [hazzazy@aucegypt.edu](mailto:hazzazy@aucegypt.edu), Tel.: +2 02 2615 2559; Fax: +2 02 2795 7565

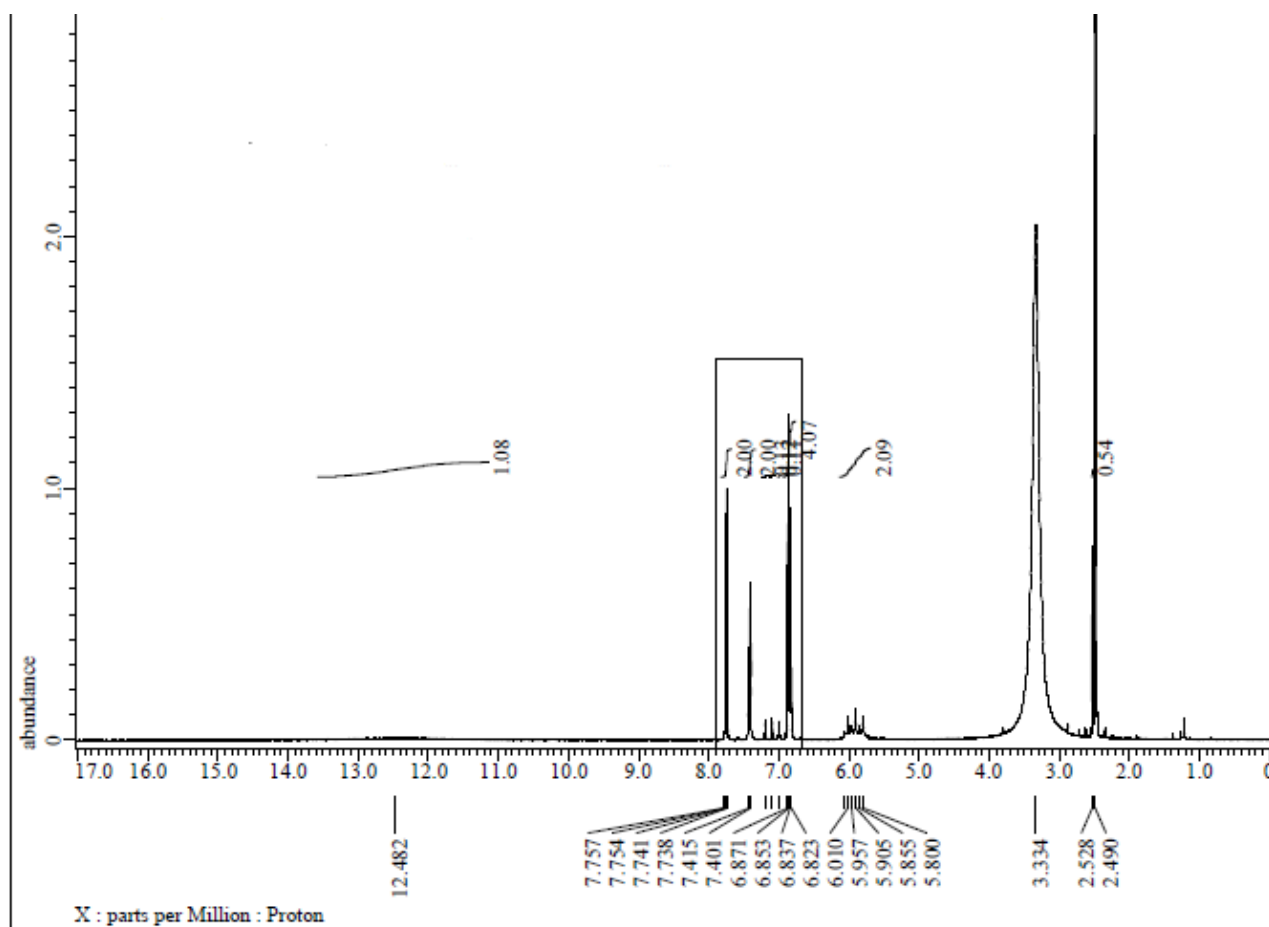

**Figure S1.**  $^1\text{H}$ -NMR characterization of Asplatin/PSC4 Complex.

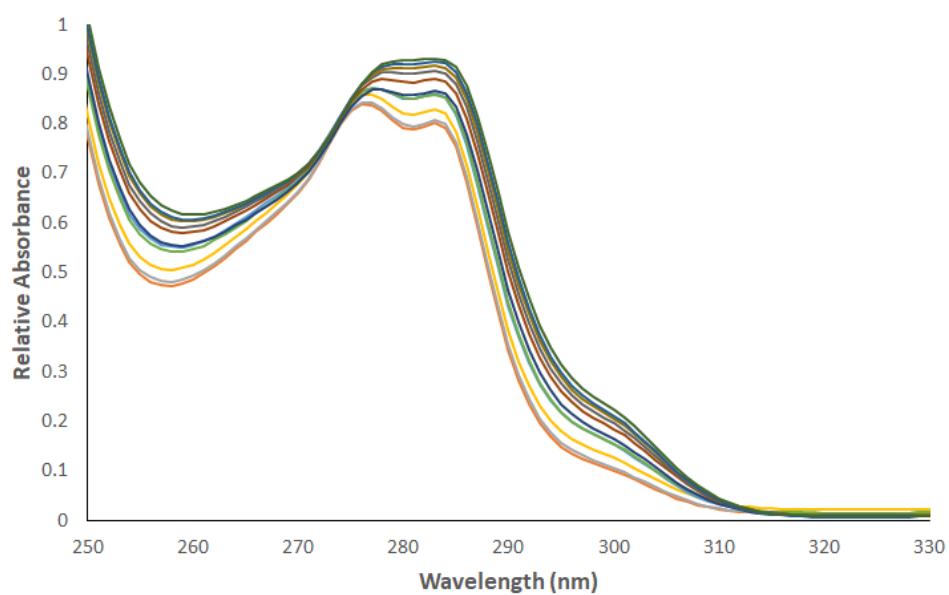

**Figure S2.** Absorbance spectra of several mixtures containing serially increasing concentrations of asplatin (0.01–0.25 mM) and a fixed concentration of 0.2 mM PSC4.

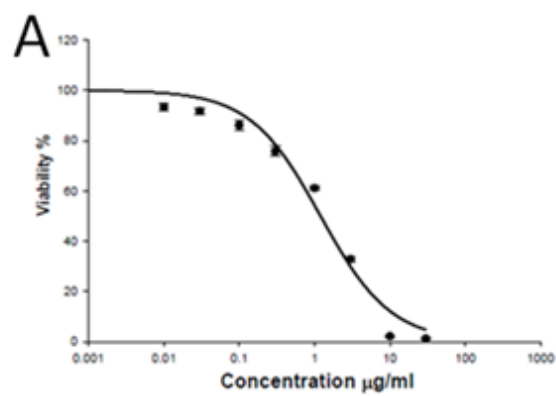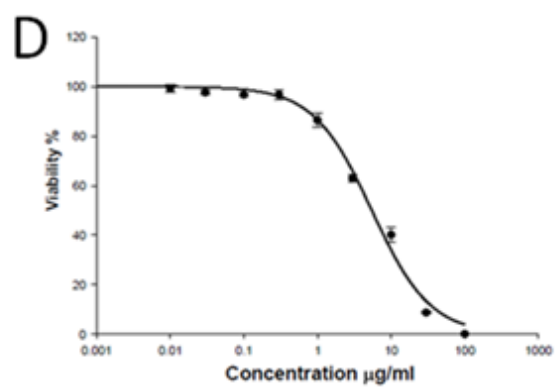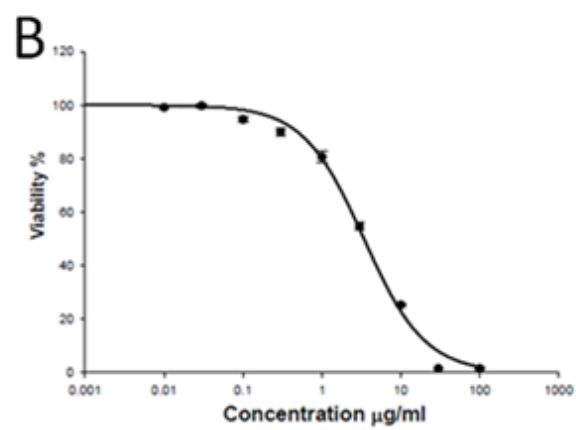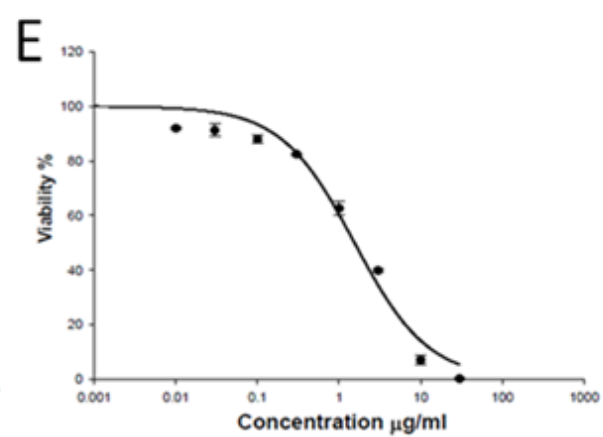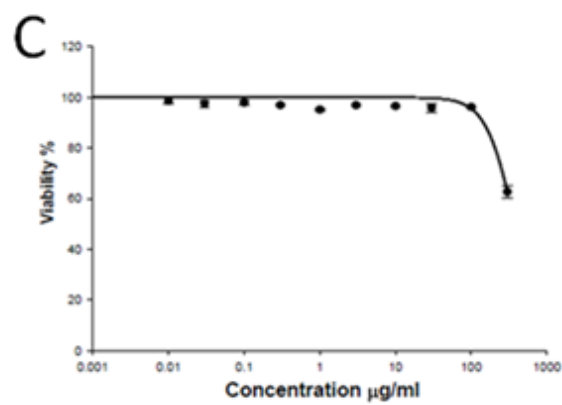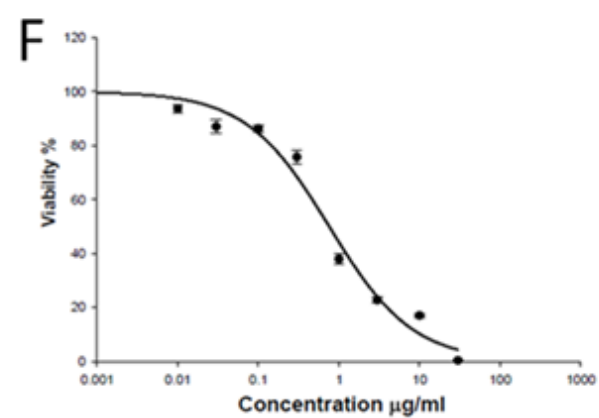

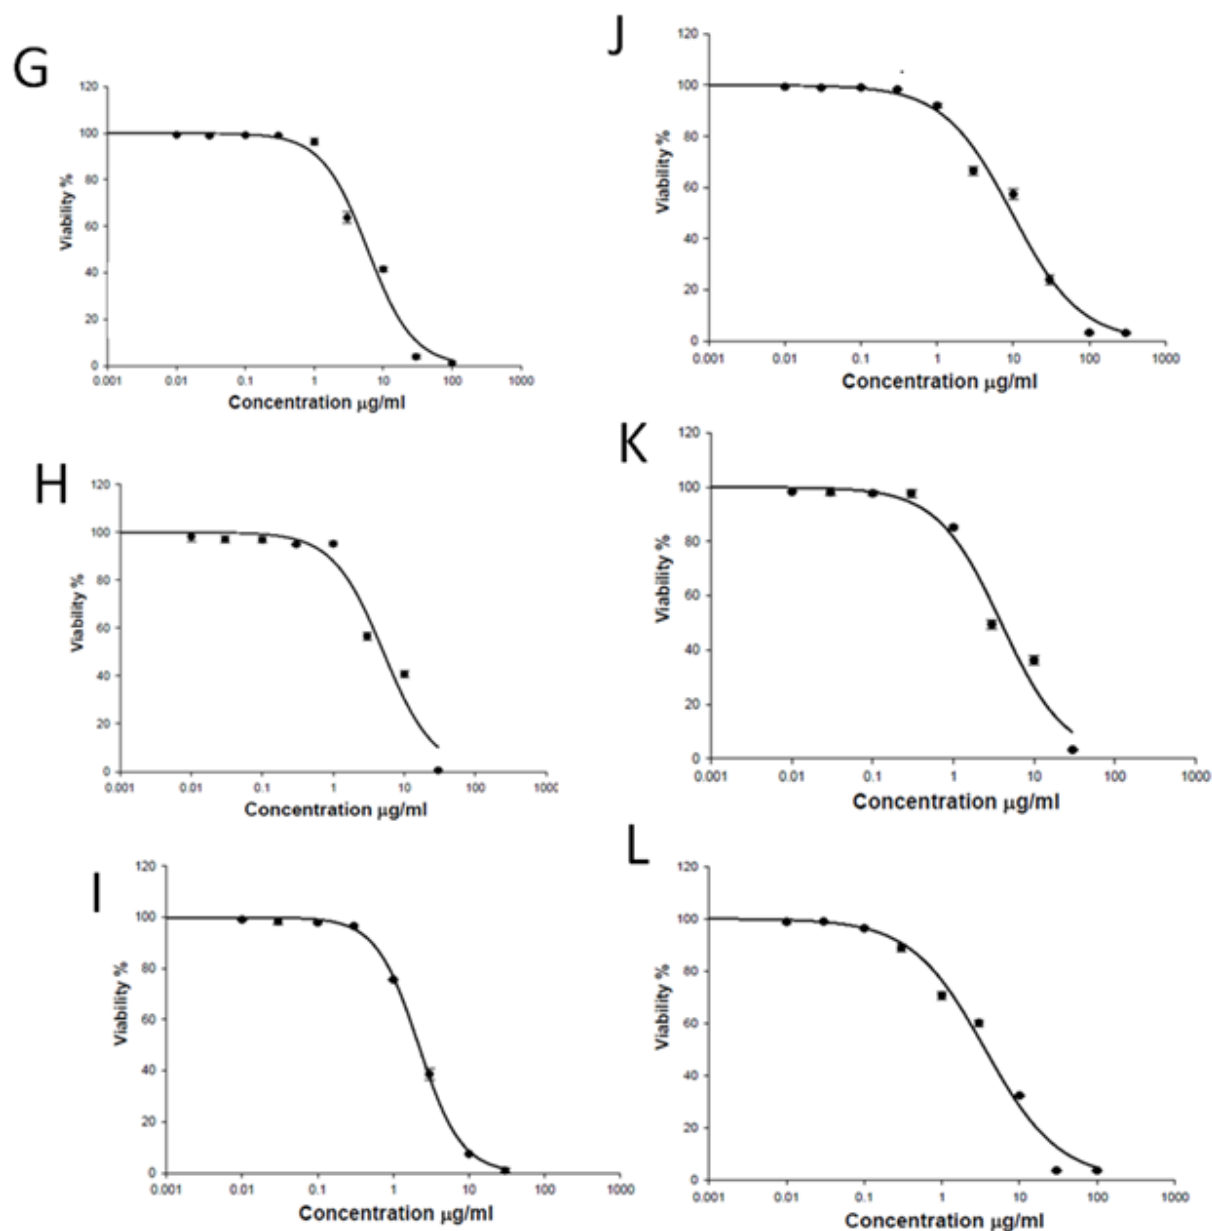

**Figure S3.** Concentration-dependent effects of cisplatin, Asplatin, and Asplatin/PSC4 on the cellular viability of (A-C) human skin fibroblasts, (D-F) MCF-7 cells, (G-I) HeLa cells, and (J – L) A-549 cells, respectively (after 48 h of treatment). All experiments were carried out in triplicates, and the mean values were calculated. Error bars represent  $\pm$  standard deviation.
